# Supplementary material for: Assessment of Staffing Needs for Registered Nurses and Licensed Practical Nurses at Primary Care Units in Brazil Using the Workload Indicators of Staffing Need (WISN) Method
Source: Research Square preprint supplement (doi:10.21203/rs.3.rs-919274/v1), 2021-09-21
Supplement: Supplementary file 1 [file f1120a73a1575f123d614036.pdf]

Table 2. Annual workload of registered nurses and licensed practical nurses in 2017, 2018 and 2019.

| Unit  | Professional category | Consultation |       |       | Outpatient procedures |      |      | Home visit |       |       | Support to exams |      |      | Promotion of education actions |      |      | Administration of medications |       |       | Control of immunization and vaccination |       |       | Vital signs, weight and height measurements |      |      | Venopuncture: venous blood sample |      |      | Care delivered to spontaneous demand |      |      |
|-------|-----------------------|--------------|-------|-------|-----------------------|------|------|------------|-------|-------|------------------|------|------|--------------------------------|------|------|-------------------------------|-------|-------|-----------------------------------------|-------|-------|---------------------------------------------|------|------|-----------------------------------|------|------|--------------------------------------|------|------|
|       |                       | 2017         | 2018  | 2019  | 2017                  | 2018 | 2019 | 2017       | 2018  | 2019  | 2017             | 2018 | 2019 | 2017                           | 2018 | 2019 | 2017                          | 2018  | 2019  | 2017                                    | 2018  | 2019  | 2017                                        | 2018 | 2019 | 2017                              | 2018 | 2019 | 2017                                 | 2018 | 2019 |
| PCU A | RN                    | 10864        | 11250 | 10368 | -                     | -    | 2    | 943        | 874   | 864   | 1                | -    | -    | 324                            | 169  | 147  | -                             | -     | -     | -                                       | -     | -     | -                                           | -    | -    | -                                 | -    | -    | -                                    | -    | -    |
|       | LPN                   | -            | -     | -     | 1229                  | 850  | 1185 | 7498       | 5643  | 5915  | 180              | 321  | 375  | 196                            | 33   | -    | 3203                          | 2774  | 2930  | 3377                                    | 12265 | 12686 | 4325                                        | 2973 | 3605 | 7526                              | 6474 | 6855 | -                                    | -    | -    |
| PCU B | RN                    | 14235        | 11352 | 11617 | -                     | 16   | 31   | 639        | 526   | 336   | -                | 371  | 807  | 1323                           | 771  | 189  | -                             | -     | -     | -                                       | -     | -     | -                                           | -    | -    | 1                                 | 8    | 3    | 486                                  | 8    |      |
|       | LPN                   | -            | -     | -     | 591                   | 1049 | 1159 | 7911       | 7183  | 5522  | 689              | 1201 | 1023 | 89                             | 8    | 1    | 1852                          | 2815  | 2916  | 4224                                    | 13613 | 15056 | 11935                                       | 7676 | 6412 | 4638                              | 4014 | 3592 | -                                    | -    | -    |
| PCU C | RN                    | 18337        | 18886 | 16889 | -                     | 4    | 72   | 2425       | 2275  | 2301  | 43               | 117  | 150  | 200                            | 28   | 375  | -                             | -     | 3     | -                                       | -     | -     | -                                           | -    | 1    | 60                                | -    | -    | 105                                  | 328  | 34   |
|       | LPN                   | -            | -     | -     | 2601                  | 3279 | 3102 | 11974      | 11598 | 11710 | 963              | 2365 | 1399 | -                              | 1    | -    | 4924                          | 7436  | 6552  | 4642                                    | 26453 | 19266 | 6047                                        | 6364 | 4455 | 9992                              | 8473 | 7204 | -                                    | -    | -    |
| PCU D | RN                    | 7508         | 11227 | 9006  | -                     | -    | -    | 482        | 366   | 141   | 6                | 23   | 496  | 81                             | 6    | -    | -                             | -     | -     | -                                       | -     | -     | -                                           | -    | -    | -                                 | -    | -    | 5485                                 | 21   | 9    |
|       | LPN                   | -            | -     | -     | 1031                  | 914  | 1719 | 2976       | 2678  | 3310  | 650              | 579  | 370  | 9                              | 3    | -    | 6086                          | 13934 | 14656 | 4232                                    | 10209 | 12258 | 6498                                        | 5914 | 4089 | 5101                              | 4117 | 4208 | -                                    | -    | -    |
| PCU E | RN                    | 17781        | 17677 | 19498 | -                     | -    | 7    | 2728       | 2401  | 2036  | 280              | 433  | 1268 | 217                            | 127  | 151  | 1                             | 1     | -     | -                                       | -     | -     | -                                           | -    | -    | -                                 | 1    | 8    | 16                                   | 7    |      |
|       | LPN                   | -            | -     | -     | 1285                  | 1539 | 1588 | 11023      | 9294  | 4663  | 1538             | 1390 | 630  | 254                            | 125  | 78   | 12119                         | 13554 | 15597 | 6806                                    | 18212 | 14339 | 8289                                        | 5517 | 5278 | 6490                              | 5557 | 5668 | -                                    | -    | -    |
| PCU F | RN                    | 27814        | 23323 | 21585 | -                     | 1    | 19   | 2522       | 2176  | 1744  | 346              | 559  | 125  | 333                            | 227  | 180  | -                             | -     | -     | -                                       | -     | -     | -                                           | 24   | 2    | -                                 | -    | 1    | 276                                  | 6    | -    |
|       | LPN                   | -            | -     | -     | 3532                  | 2416 | 1901 | 15431      | 13744 | 9215  | 756              | 1245 | 561  | 15                             | -    | -    | 10854                         | 8123  | 7578  | 6257                                    | 25959 | 20668 | 11631                                       | 8987 | 5558 | 10347                             | 9226 | 9386 | -                                    | -    | -    |
| PCU G | RN                    | 17398        | 19687 | 14050 | -                     | 16   | 4    | 859        | 942   | 761   | -                | 186  | 888  | 13                             | 25   | 36   | -                             | -     | -     | -                                       | -     | -     | -                                           | -    | -    | -                                 | -    | -    | -                                    | -    | 101  |
|       | LPN                   | -            | -     | -     | 1316                  | 1752 | 2169 | 7304       | 7270  | 5165  | 928              | 1813 | 1515 | 57                             | 52   | 7    | 4377                          | 5246  | 6067  | 4627                                    | 16058 | 15154 | 6496                                        | 5598 | 6390 | 4981                              | 5949 | 6667 | -                                    | -    | -    |
| PCU H | RN                    | 14902        | 14245 | 10718 | 176                   | 59   | 70   | 1880       | 1040  | 1370  | 125              | 562  | 1933 | 112                            | 115  | 190  | -                             | -     | -     | -                                       | -     | -     | -                                           | -    | -    | 469                               | 45   | 4    | 635                                  | 387  | 175  |
|       | LPN                   | -            | -     | -     | 2265                  | 2007 | 2434 | 8006       | 6012  | 6329  | 834              | 1487 | 471  | -                              | -    | -    | 2532                          | 3734  | 4030  | 4867                                    | 16104 | 15580 | 5378                                        | 4491 | 3326 | 7277                              | 7946 | 4836 | -                                    | -    | -    |
| PCU I | RN                    | 19268        | 16013 | 13144 | 1                     | -    | 16   | 1371       | 986   | 1694  | 319              | 372  | 1489 | 64                             | 23   | 3    | -                             | -     | -     | -                                       | -     | -     | -                                           | -    | -    | -                                 | -    | -    | 138                                  | 100  | 30   |
|       | LPN                   | -            | -     | -     | 1171                  | 1321 | 1512 | 8718       | 5766  | 2858  | 195              | 419  | 355  | -                              | -    | -    | 3335                          | 3782  | 4466  | 5333                                    | 17515 | 16133 | 4273                                        | 3657 | 3227 | 4672                              | 5394 | 5069 | -                                    | -    | -    |
| PCU J | RN                    | 11493        | 12630 | 13068 | -                     | -    | 3    | 217        | 456   | 1558  | 2                | 303  | 1336 | 44                             | 53   | 280  | -                             | -     | -     | -                                       | -     | -     | -                                           | -    | -    | -                                 | -    | -    | 2829                                 | 1433 | 75   |
|       | LPN                   | -            | -     | -     | 481                   | 621  | 1094 | 7206       | 8106  | 9250  | 571              | 339  | 725  | 59                             | 26   | -    | 2022                          | 3896  | 4434  | 4629                                    | 16098 | 16920 | 5050                                        | 3853 | 5006 | 3230                              | 4923 | 5991 | -                                    | -    | -    |
| PCU L | RN                    | 19195        | 20869 | 17284 | -                     | -    | 1    | 1723       | 1189  | 2692  | -                | 126  | 32   | 38                             | 175  | 6    | -                             | 12    | -     | -                                       | -     | 39    | 5                                           | 1    | 5    | -                                 | -    | -    | -                                    | -    | -    |
|       | LPN                   | -            | -     | -     | 2027                  | 1996 | 2175 | 15454      | 13613 | 10572 | 793              | 665  | 757  | 1                              | -    | -    | 5254                          | 4468  | 5539  | 5850                                    | 30192 | 29919 | 12417                                       | 8368 | 5882 | 9536                              | 7260 | 8109 | -                                    | -    | -    |
| PCU M | RN                    | 13862        | 14629 | 14276 | 18                    | 12   | 26   | 2354       | 2304  | 2240  | 134              | 197  | 1545 | 167                            | 61   | 58   | -                             | -     | -     | -                                       | -     | -     | -                                           | 1    | -    | -                                 | -    | 38   | -                                    | 1    |      |
|       | LPN                   | -            | -     | -     | 2028                  | 1178 | 1699 | 11115      | 11205 | 11085 | 209              | 198  | 427  | 133                            | 75   | 1    | 3431                          | 1009  | 3028  | 6570                                    | 16183 | 11950 | 10684                                       | 6758 | 6588 | 7093                              | 5202 | 5443 | -                                    | -    | 3    |
| PCU N | RN                    | 14351        | 13577 | 13222 | -                     | 3    | 57   | 1120       | 1262  | 1296  | 157              | 303  | 701  | 230                            | 8    | 31   | -                             | -     | -     | -                                       | -     | -     | -                                           | -    | 238  | -                                 | -    | -    | -                                    | -    | 103  |

|     |     |     |     |      |      |      |     |     |     |     |    |    |      |      |      |           |       |       |      |      |      |      |      |      |   |   |   |
|-----|-----|-----|-----|------|------|------|-----|-----|-----|-----|----|----|------|------|------|-----------|-------|-------|------|------|------|------|------|------|---|---|---|
| LPN | 620 | 726 | 661 | 7795 | 7647 | 7329 | 332 | 609 | 692 | 171 | 60 | 13 | 2279 | 2775 | 3395 | 1872<br>9 | 37333 | 24507 | 2961 | 4077 | 3919 | 5575 | 4337 | 4901 | - | - | - |
|-----|-----|-----|-----|------|------|------|-----|-----|-----|-----|----|----|------|------|------|-----------|-------|-------|------|------|------|------|------|------|---|---|---|

RN= registered nurses; LPN = licensed practical nurses
